# Supplementary material for: Hydroxylated Fatty Acids: The Role of the Sphingomyelin Synthase and the Origin of Selectivity
Source: MDPI journal article supplement (doi:10.3390/membranes11100787), 2021-10-16
Supplement: s1 [file s1]

## Supplementary materials

# Hydroxylated Fatty Acids: The Role of the Sphingomyelin Synthase and the Origin of Selectivity

Lucia Sessa \*, Anna Maria Nardiello, Jacopo Santoro, Simona Concilio and Stefano Piotto \*

Department of Pharmacy, University of Salerno, via Giovanni Paolo II, 84084 132 Fisciano (SA), Italy;  
annardiello@unisa.it (A.M.N.); jsantoro@unisa.it (J.S.); sconcilio@unisa.it (S.C.)

\* Correspondence: lucsess@unisa.it (L.S.); piotto@unisa.it (S.P.)

### Reconstruction of the SMS pathway

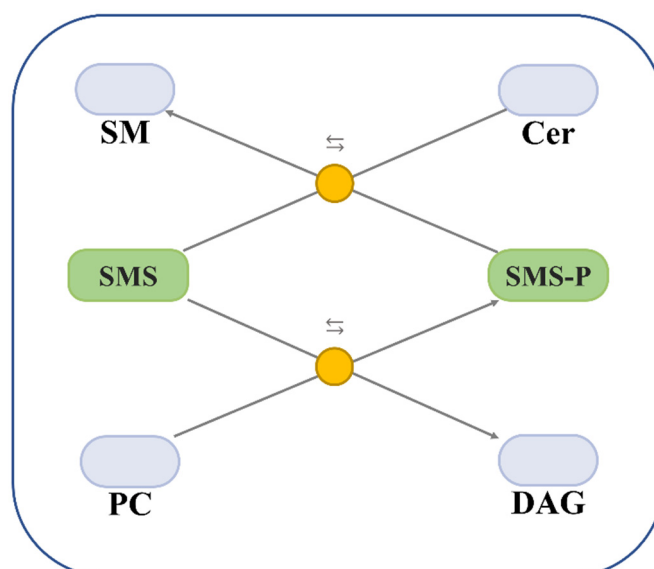

**Figure S1.** Graphical representation of modeled reactions. In green are the enzyme SMS and the enzyme state with the modified tyrosine (SMS-P). In gray are the substrates PC, DAG, Cr and SM.

### 3D-structure validation

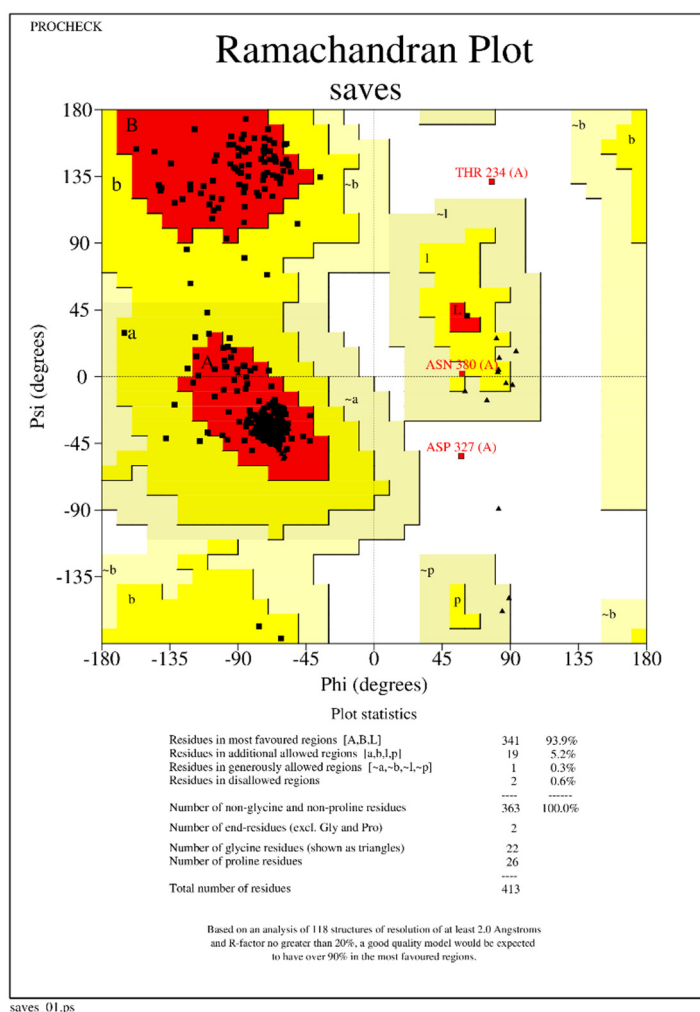

**Figure S2.** Ramachandran plot for SMS1 showing the presence of amino acid residues in favored, allowed, and outlier regions

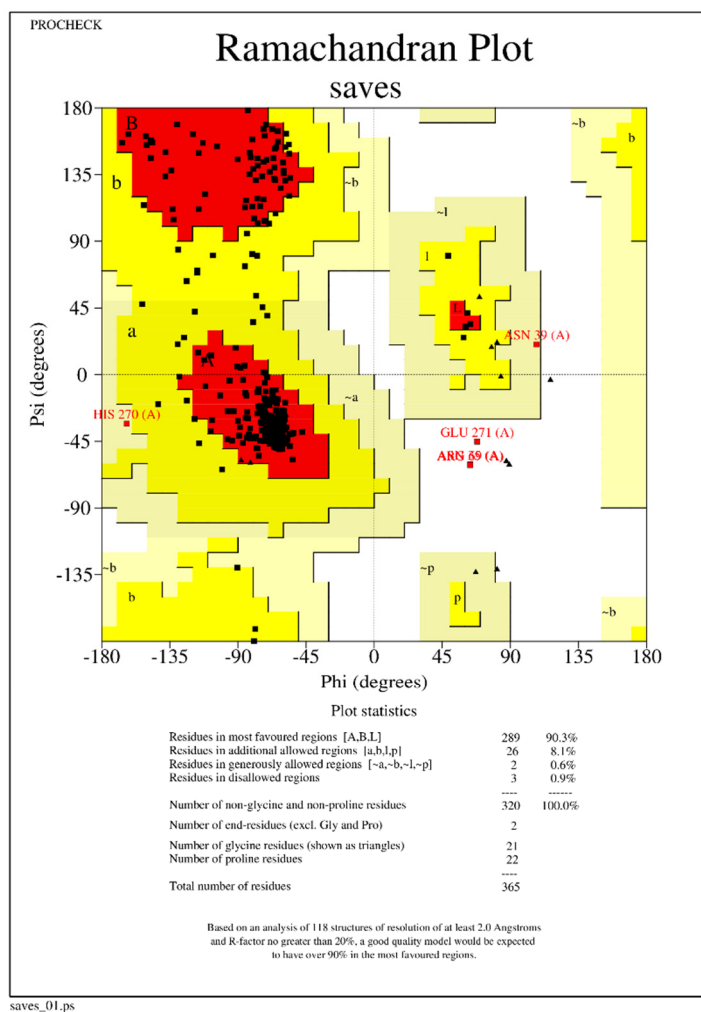

**Figure S3.** Ramachandran plot for SMS2 showing the presence of amino acid residues in favored, allowed, and outlier regions

**Table S1.** Summary of the quality of SMS1 structure

| SMS1 structure built in this work                    | Previous SMS1 structure                              |
|------------------------------------------------------|------------------------------------------------------|
| Structure Z-scores, positive is better than average: | Structure Z-scores, positive is better than average: |
| 1st generation packing quality : -1.538              | 1st generation packing quality : -3.250              |
| 2nd generation packing quality : -1.675              | 2nd generation packing quality : -3.718 (poor)       |
| Ramachandran plot appearance : -0.541                | Ramachandran plot appearance : -3.698 (poor)         |
| chi-1/chi-2 rotamer normality : 1.311                | chi-1/chi-2 rotamer normality : -3.618 (poor)        |
| Backbone conformation : -1.966                       | Backbone conformation : -3.838 (poor)                |
| RMS Z-scores, should be close to 1.0:                | RMS Z-scores, should be close to 1.0:                |
| Bond lengths : 1.127                                 | Bond lengths : 1.174                                 |
| Bond angles : 0.442 (tight)                          | Bond angles : 0.675                                  |
| Omega angle restraints : 1.469 (loose)               | Omega angle restraints : 1.655 (loose)               |
| Side chain planarity : 0.943                         | Side chain planarity : 1.513                         |
| Improper dihedral distribution : 0.572               | Improper dihedral distribution : 1.156               |
| Inside/Outside distribution : 1.237 (unusual)        | Inside/Outside distribution : 1.276 (unusual)        |

We compared the 3D structure of SMS1 built in this work with our previous work [1]. The new model is a much more accurate three-dimensional structure

## Sequence alignment

**Table S2.** Multiple Sequence alignment for the whole sequences of hSMS1 and hSMS2

CLUSTAL O(Version 1.2.4) multiple sequence alignment

|      |                                                               |     |
|------|---------------------------------------------------------------|-----|
| SMS1 | MKEVVYVSPKKVADWLLNAMPEYCEPLEHFTGQDLINLTQEDFKKPPLCRVSSDNGQRL   | 60  |
| SMS2 | -----                                                         | 0   |
| SMS1 | LDMIETLKMEHLEAHKNGHANGHLNIGVDIPTDGSFSIKIKPNGMPNGYR-----KE     | 114 |
| SMS2 | MDIITAKLEEHLNQPSDPTNTYARPAE--PVEENKNGNGKPKSLSSGLRKGTKKYPD     | 58  |
|      | .*:*** *.*.*** : .. :* : . . *. : . . : **:.. :.* * :         |     |
| SMS1 | MIKIPMEPELERSQYPMEWGKTFLAFLYALSCFVLTTVMISVVHERVPPKEVQPPLPDTFF | 174 |
| SMS2 | YIQIAMPTESRNKFPLEWWKTGIAFIYAVFNLVLTVMITVVHERVPPKELSPPLPKFF    | 118 |
|      | *:* ** *.*:.*:*** ** :*:**: :*****:*****:.*****.*             |     |
| SMS1 | DHFNVRVQWAFSICEINGMILVGLWLIQWLLKYSIISRFFCIVGTLYLRCITMYVTT     | 234 |
| SMS2 | DYIDRVKWAFSVSEINGIILVGLWITQWLFLRYKSIVGRRFCFIIGTLYLRCITMYVTT   | 178 |
|      | *:.*:***:.*:***:*****: ***:.*:***:.* ** :*****                |     |
| SMS1 | LPVPGMHFNCSPKLFGDWEAQLRRIMKLIAGGGLSITGSHNMGDYLVSHTVMLTLTYL    | 294 |
| SMS2 | LPVPGMHFQCAPKLNQDSQAKVQRILRLISGGGLSITGSHILCGDPLFSGHTVTLTLTYL  | 238 |
|      | *****:.*:*** ** :*:.*:***:*****: ***:.*:***** *****           |     |
| SMS1 | FIKEYSPRRLWWYHWICWLLSVVGIFCILLADHDYTVDVVYAYITTRLFWWYHTMANQQ   | 354 |
| SMS2 | FIKEYSPRHFWWYHLICWLLSAAGIICILVAHEHYTIDVIAIYYITTRLFWWYHSMANEK  | 298 |
|      | *****:.*:*** *****. ***:***:***:***:***:*****:*****:***:*     |     |
| SMS1 | VLKEASQMNLLARVWVWYRPFQYFEKNVQGIVPRSYHWPFPVVLHLSRQV-KYSRLVNDT  | 413 |
| SMS2 | NLKVSSQTNFLSRWWFPIFYFEKNVQGSIPCCFSWPLSWPPGCFKSSCKKYSRVQKIG    | 358 |

|      |         |     |
|------|---------|-----|
| SMS1 | -----   | 413 |
| SMS2 | EDNEKST | 365 |

\*      asterisk      positions that have a single and fully conserved residue  
:      colon      conservation between groups of strongly similar properties  
with a score greater than .5 on the PAM 250 matrix  
  
.      period      conservation between groups of weakly similar properties  
with a score less than or equal to .5 on the PAM 250 matrix

**Table S3:** Prediction of sp|Q86VZ5|SMS1\_HUMAN

| ID | sp Q86VZ5 SMS1_HUMAN |     |     |                  |
|----|----------------------|-----|-----|------------------|
| FT | TOPO_DOM             | 1   | 134 | CYTOPLASMIC.     |
| FT | TRANSMEM             | 135 | 156 |                  |
| FT | TOPO_DOM             | 157 | 181 | NON CYTOPLASMIC. |
| FT | TRANSMEM             | 182 | 203 |                  |
| FT | TOPO_DOM             | 204 | 214 | CYTOPLASMIC.     |
| FT | TRANSMEM             | 215 | 233 |                  |
| FT | TOPO_DOM             | 234 | 279 | NON CYTOPLASMIC. |
| FT | TRANSMEM             | 280 | 296 |                  |
| FT | TOPO_DOM             | 297 | 304 | CYTOPLASMIC.     |
| FT | TRANSMEM             | 305 | 325 |                  |
| FT | TOPO_DOM             | 326 | 330 | NON CYTOPLASMIC. |
| FT | TRANSMEM             | 331 | 347 |                  |
| FT | TOPO_DOM             | 348 | 413 | CYTOPLASMIC.     |

**Table S4:** Prediction of sp|Q8NHU3|SMS2\_HUMAN

| ID | sp Q8NHU3 SMS2_HUMAN |     |     |                  |
|----|----------------------|-----|-----|------------------|
| FT | TOPO_DOM             | 1   | 78  | CYTOPLASMIC.     |
| FT | TRANSMEM             | 79  | 100 |                  |
| FT | TOPO_DOM             | 101 | 125 | NON CYTOPLASMIC. |
| FT | TRANSMEM             | 126 | 147 |                  |
| FT | TOPO_DOM             | 148 | 158 | CYTOPLASMIC.     |
| FT | TRANSMEM             | 159 | 177 |                  |
| FT | TOPO_DOM             | 178 | 216 | NON CYTOPLASMIC. |
| FT | TRANSMEM             | 217 | 240 |                  |
| FT | TOPO_DOM             | 241 | 248 | CYTOPLASMIC.     |
| FT | TRANSMEM             | 249 | 269 |                  |
| FT | TOPO_DOM             | 270 | 274 | NON CYTOPLASMIC. |
| FT | TRANSMEM             | 275 | 291 |                  |
| FT | TOPO_DOM             | 292 | 365 | CYTOPLASMIC.     |

CLUSTAL O(1.2.4) multiple sequence alignment

\*        asterisk        positions that have a single and fully conserved residue  
:        colon        conservation between groups of strongly similar properties  
         with a score greater than .5 on the PAM 250 matrix  
  
.        period        conservation between groups of weakly similar properties  
         with a score less than or equal to .5 on the PAM 250 matrix

## Metadynamics Simulations

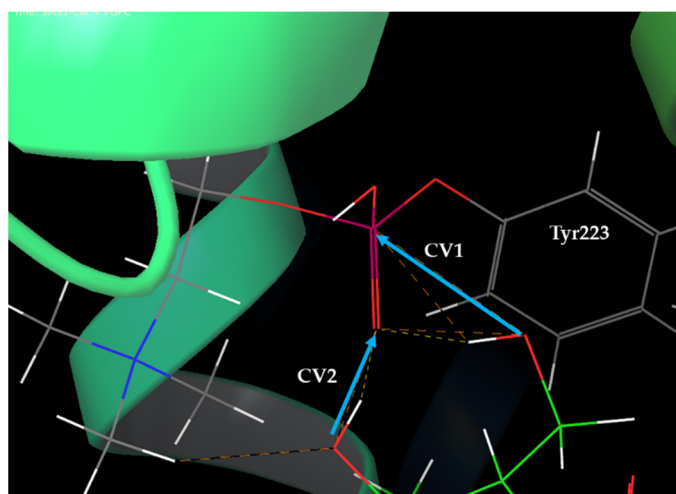

**Figure S4.** Atoms chosen as CV for metadynamics simulations for the SMS1 system.

The CV1 is the distance between the atom O5 of the Ceramide and the P1 of the modified tyrosine residue. The CV2 is the distance between the oxygen atom of the phosphate group and the hydroxyl group of the sphingosine chain.

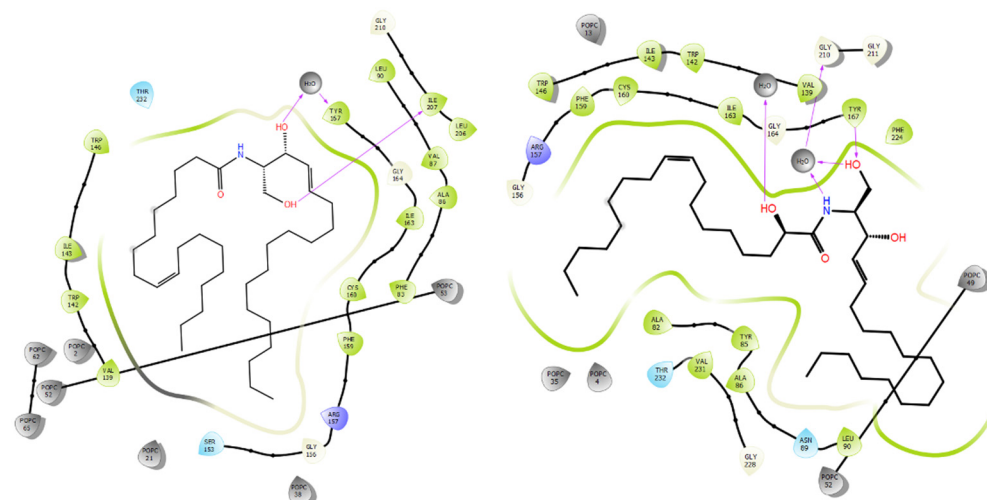

**Figure S5.** Ligand interaction diagram of Ceramide (on the left) and 2ROHCer (on the right) in complex with SMS2P. The pink arrows indicate the hydrogen bond that is established between the oxygen atoms of the ligand and the residues of the SMS2 protein.

## Reference

1. Piotto, S.; Sessa, L.; Iannelli, P.; Concilio, S. Computational study on human sphingomyelin synthase 1 (hSMS1). *Biochimica et biophysica acta. Biomembranes* **2017**, *1859*, 1517-1525, doi:10.1016/j.bbamem.2017.04.004.
